# Supplementary material for: Nanoscalein silicoclassification of ligand functionalised surfaces for protein adsorption resistance
Source: Royal Society of Chemistry journal article supplement (doi:10.1039/c9nr10009a), 2020-01-01
Supplement: c9nr10009a1.pdf [file c9nr10009a1.pdf]

# Nanoscale *in-silico* classification of ligand functionalised surfaces for protein adsorption resistance

*Matthew Penna†‡ and Irene Yarovsky†‡\**

† School of Engineering, RMIT University, Melbourne, VIC, Australia, 3000

‡ ARC Research Hub for Australian Steel Manufacturing, Wollongong, NSW, 2522

## Supplementary Figures

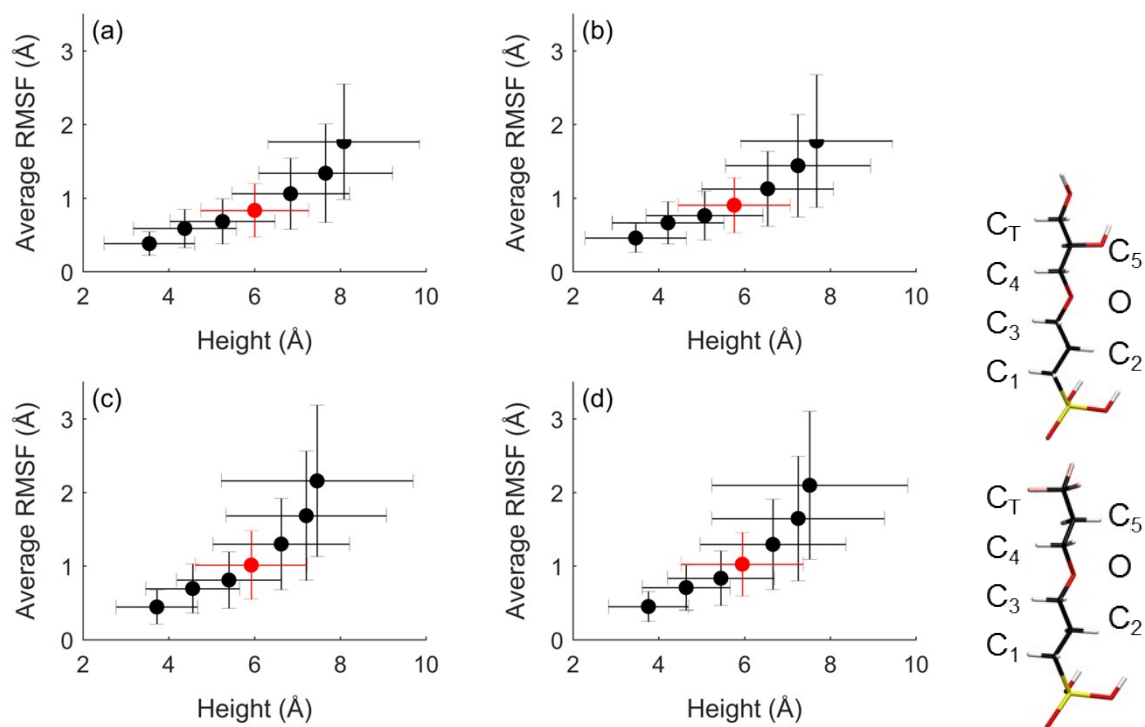

**Fig. S1:** Average RMSFs of heavy atoms along the ligand chain (from left to right C<sub>1</sub>, C<sub>2</sub>, C<sub>3</sub>, O, C<sub>4</sub>, C<sub>5</sub>, C<sub>T</sub>) against the height above the substrate for (a) GPS, (b) CF<sub>3</sub>, (c) GPS:sNH<sub>2</sub>, and (d) GPS:sCF<sub>3</sub> systems.

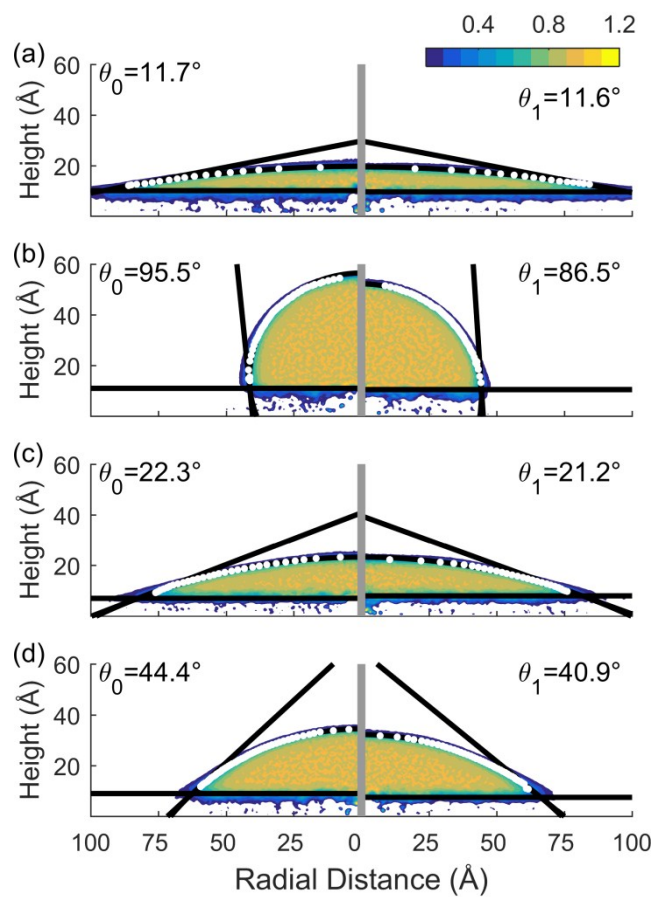

**Fig. S2:** Relative density maps for 2 equilibrated water droplets on the (a) GPS, (b)  $\text{CF}_3$ , (c) GPS:sNH<sub>2</sub>, and (d) GPS:sCF<sub>3</sub> systems in-vacuum with colorbar showing relative atomic density compared to bulk TIP3P water and contact angle estimates shown.

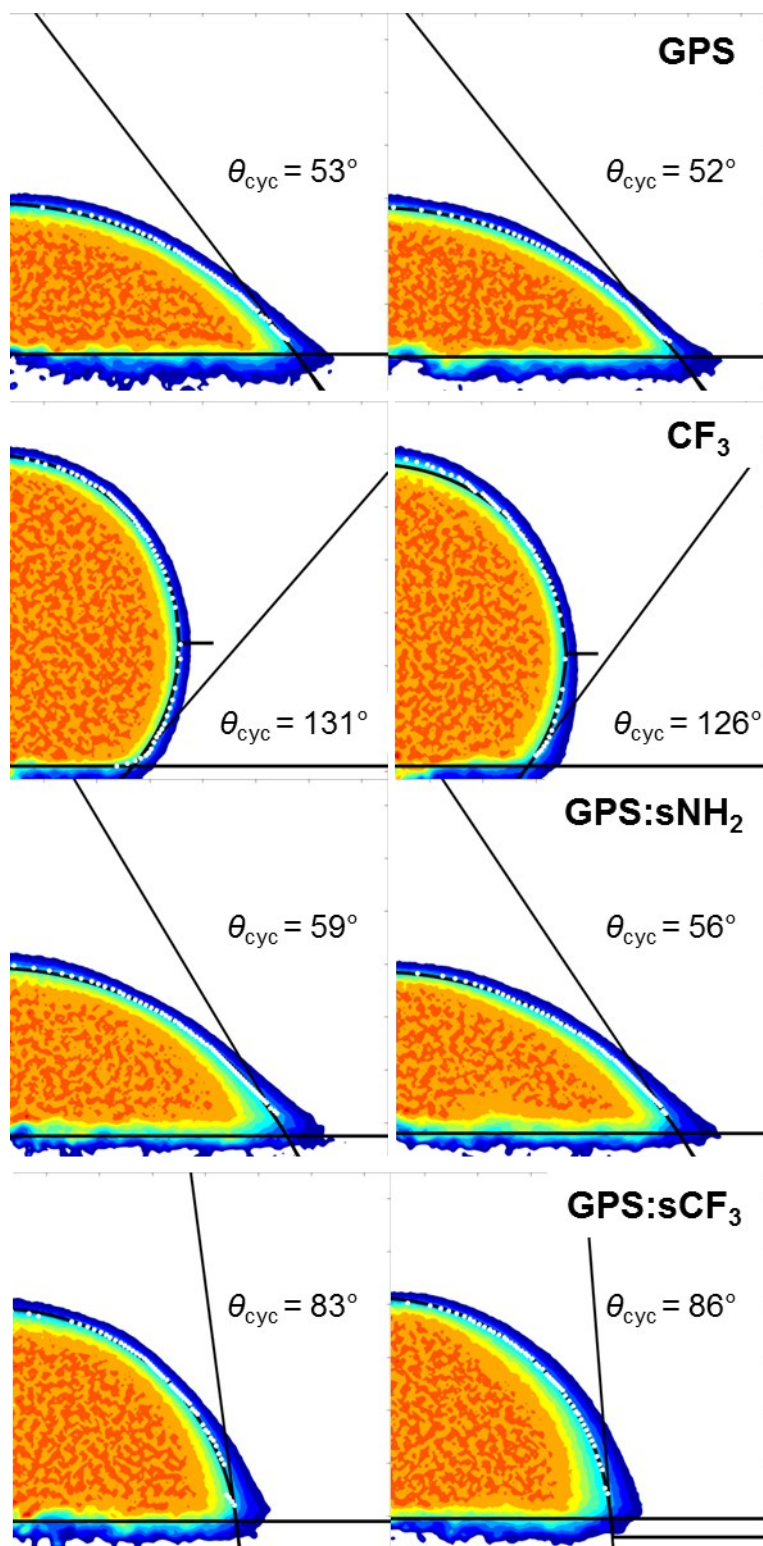

**Fig. S3:** Relative density maps of water droplet immersed in cyclooctane for the time from 10 to 5 ns before run termination; droplet fitted circle, droplet base height and tangent at the cross over point are shown in black, water contact angle estimates,  $\theta_{co}$ , are shown for each system

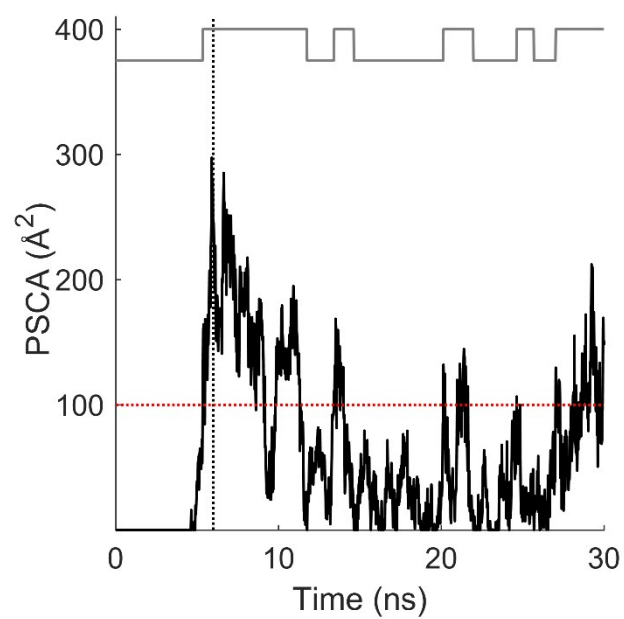

**Fig. S4:** Magnified PSCA data for exemplar trajectory.

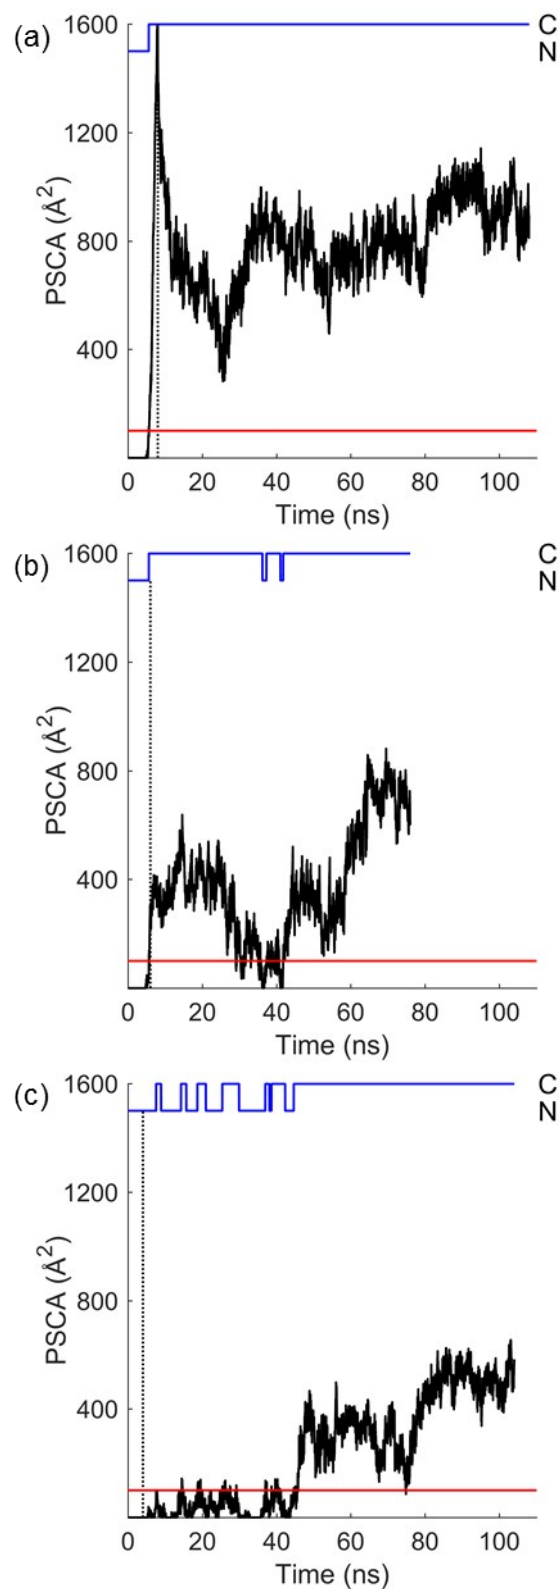

**Fig. S5:** Protein-surface contact area as a function of run time (black); time evolution of whether the protein is in contact (C) or not in contact (N) with the surface by the PAE definition (blue); PSCA for defining a PAE (horizontal red); force release point (vertical black dotted) for the protein at (a) GPS from the bound release point; (b) GPS from the transition release point; and (c) GPS from the association release point.

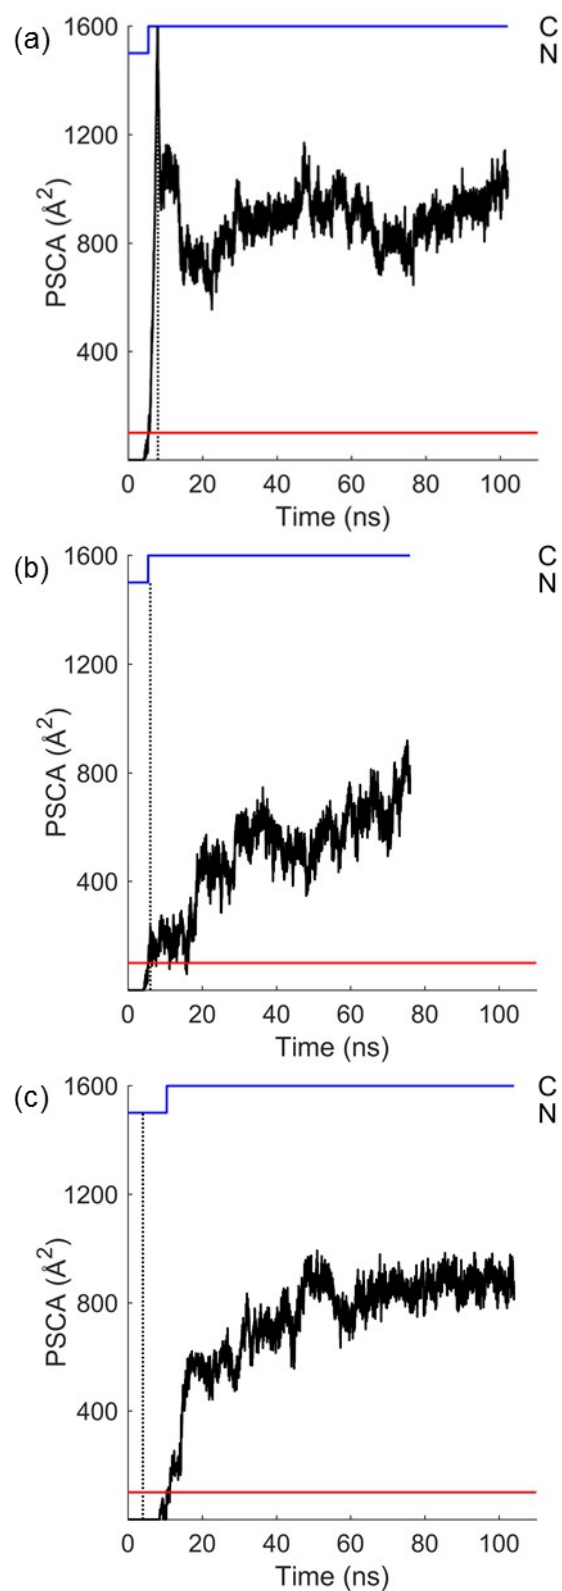

**Fig. S6:** Protein-surface contact area as a function of run time (black); time evolution of whether the protein is in contact (C) or not in contact (N) with the surface by the PAE definition (blue); PSCA for defining a PAE (horizontal red); force release point (vertical black dotted) for the protein at (a)  $\text{CF}_3$  from the bound release point; (b)  $\text{CF}_3$  from the transition release point; and (c)  $\text{CF}_3$  from the association release point.

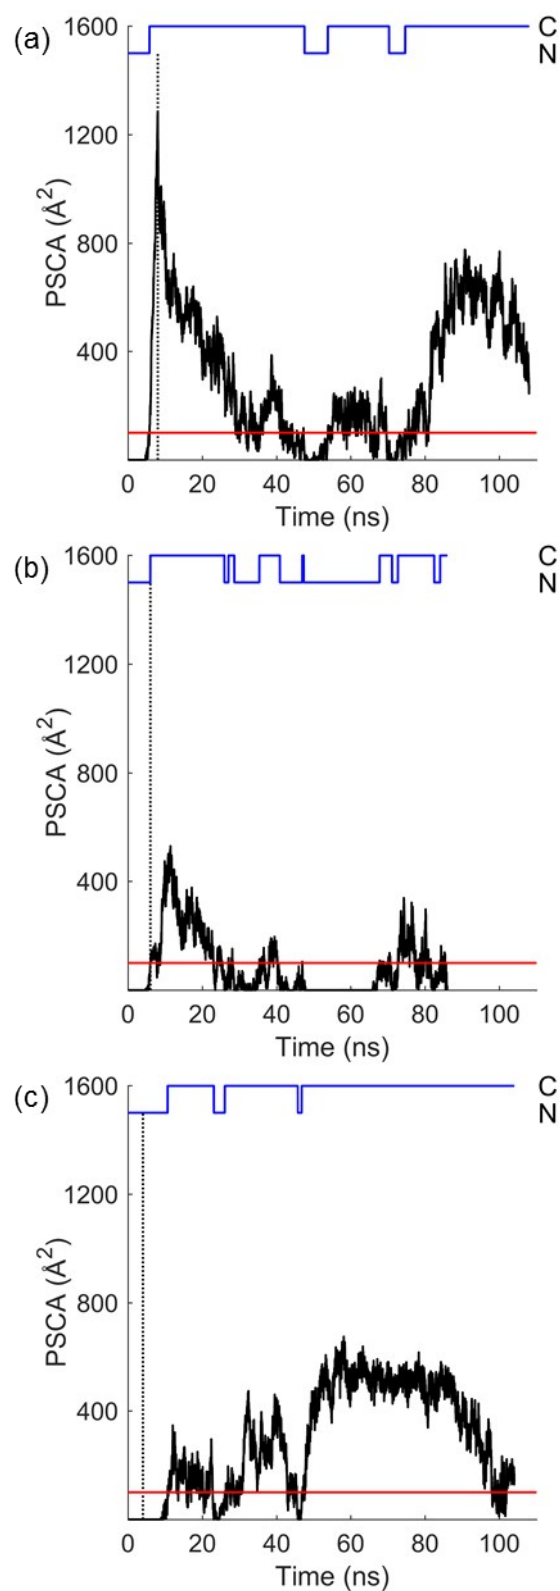

**Fig. S7:** Protein-surface contact area as a function of run time (black); time evolution of whether the protein is in contact (C) or not in contact (N) with the surface by the PAE definition (blue); PSCA for defining a PAE (horizontal red); force release point (vertical black dotted) for the protein at (a) GPS:sNH<sub>2</sub> from the bound release point; (b) GPS:sNH<sub>2</sub> from the transition release point; and (c) GPS:sNH<sub>2</sub> from the association release point.



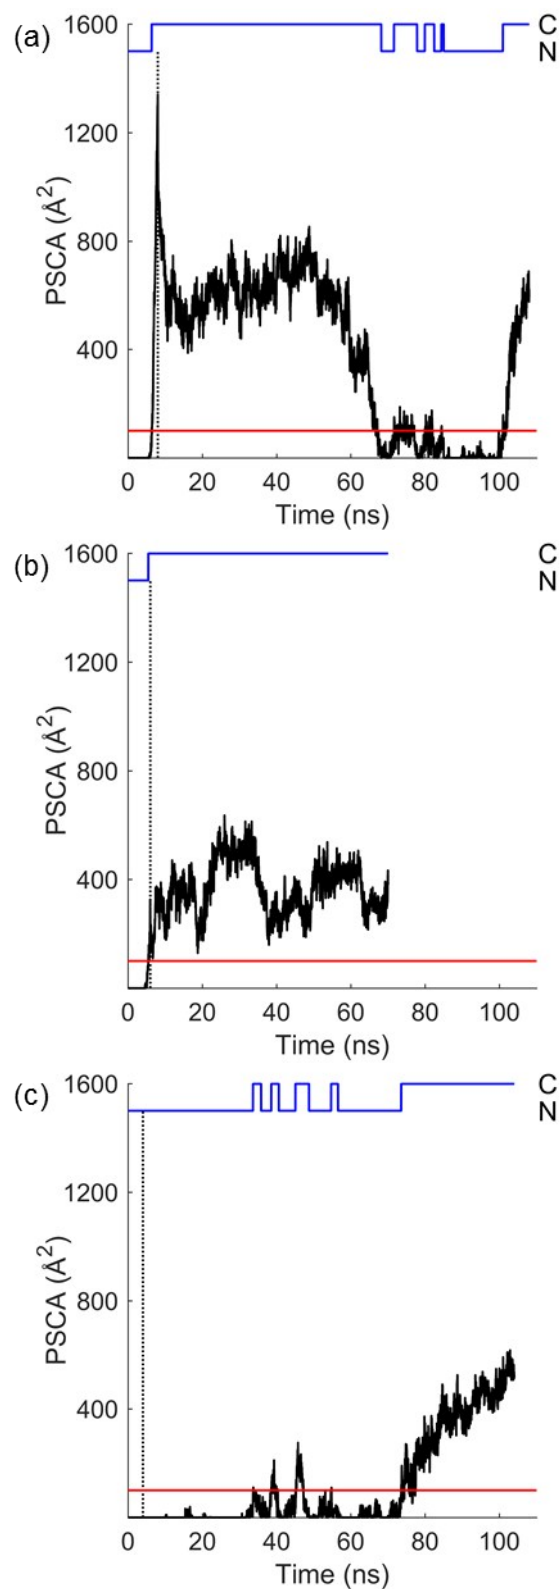

**Fig. S8:** Protein-surface contact area as a function of run time (black); time evolution of whether the protein is in contact (C) or not in contact (N) with the surface by the PAE definition (blue); PSCA for defining a PAE (horizontal red); force release point (vertical black dotted) for the protein at (a) GPS:sCF<sub>3</sub> from the bound release point; (b) GPS:sCF<sub>3</sub> from the transition release point; and (c) GPS:sCF<sub>3</sub> from the association release point.

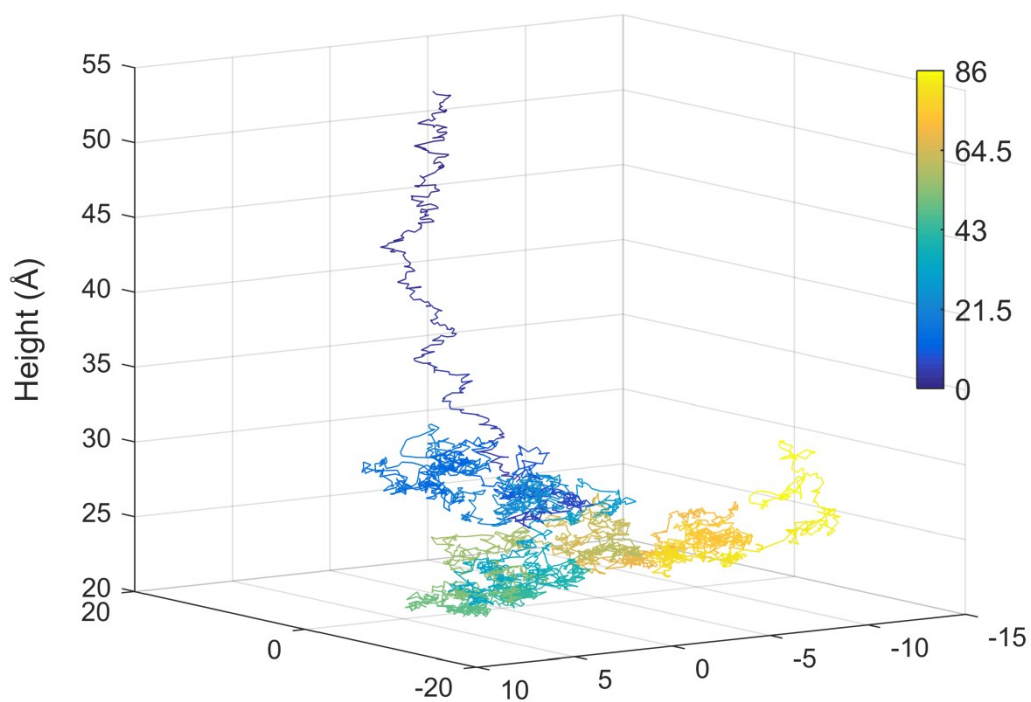

**Fig. S9:** Temporal evolution of the centre of mass of the protein from the exemplar trajectory presented in Fig 4, colorbar showing time in ns.

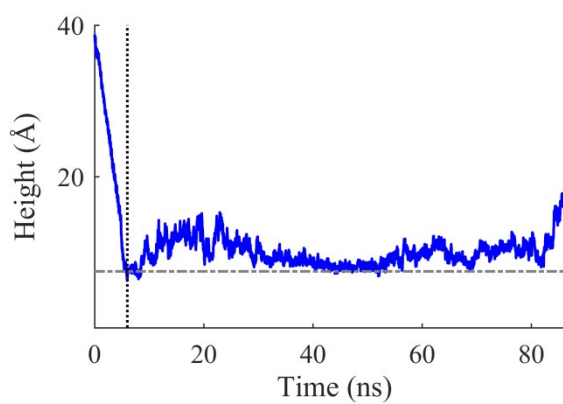

**Fig. S10:** Minimum height of protein from exemplar trajectory presented in Fig 4, average height of ligand C<sub>T</sub> atoms (horizontal dot-dash), force release time (vertical dot line).

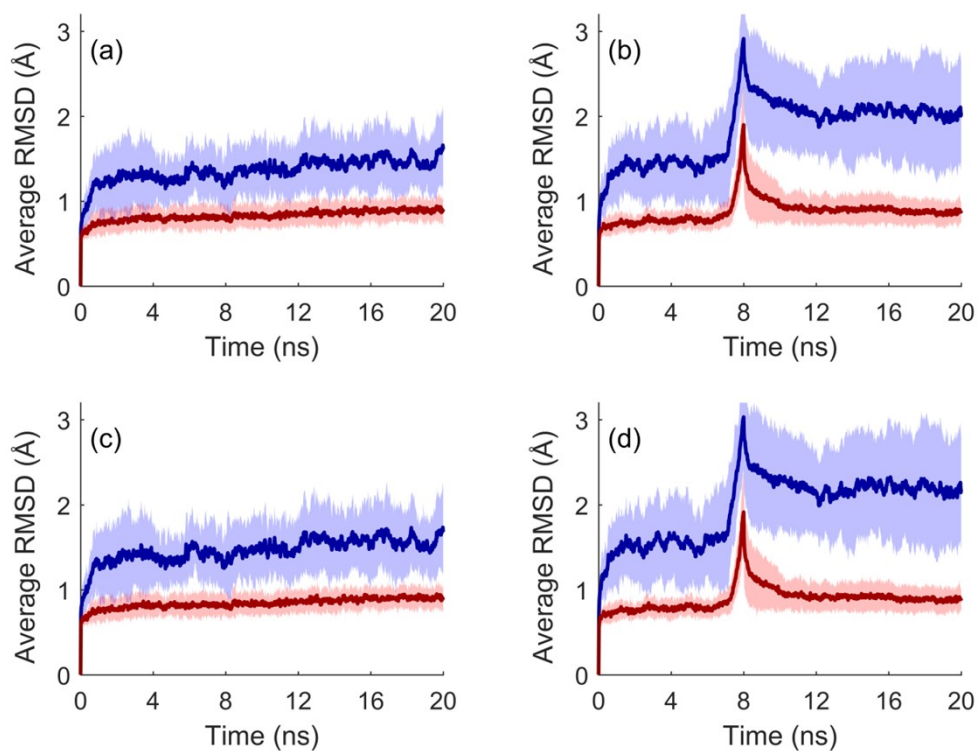

**Fig. S11:** Aligned RMSD trajectories for ubiquitin in (a and c) bulk water averaged from 20 x 20 ns blocks from the 400 ns bulk solvent simulation and (b and d) from bound release point runs for the GPS:sNH<sub>2</sub> system averaged from 20 runs performed. The shaded region shows 1 standard deviation for all systems. (a and b) RMSD based on C<sub>α</sub> atoms, (c and d) RMSD based on all heavy backbone atoms calculated over all residues (blue) and excluding C-terminal residues 72-76 (red).

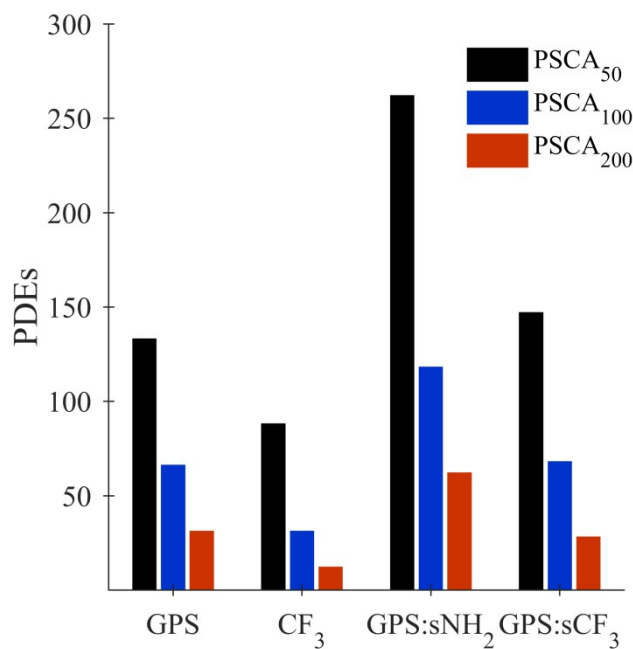

**Fig. S12:** Total number of PDEs with different threshold for defining contact.

**Table S1:** Interfacial hydration data; the count of interfacial water molecules,  $I(\text{H}_2\text{O})$ ; the count of embedded water molecules,  $E(\text{H}_2\text{O})$ ; the total number of ligand associated water molecules,  $T(\text{H}_2\text{O})$ ; and the maximum of the relative atomic density profile of embedded and interfacial water,  $(\rho_I + \rho_E)_{\text{max}}$ .

| System               | $I(\text{H}_2\text{O})$<br>molecules<br>per $\text{\AA}^2$ | $E(\text{H}_2\text{O})$<br>molecules<br>per $\text{\AA}^2$ | $T(\text{H}_2\text{O})$<br>molecules<br>per $\text{\AA}^2$ | $(\rho_I + \rho_E)_{\text{max}}$ |
|----------------------|------------------------------------------------------------|------------------------------------------------------------|------------------------------------------------------------|----------------------------------|
| GPS                  | 0.096                                                      | 0.034                                                      | 0.130                                                      | 0.67                             |
| CF3                  | 0.093                                                      | 0.026                                                      | 0.119                                                      | 0.69                             |
| GPS:sNH <sub>2</sub> | 0.102                                                      | 0.032                                                      | 0.133                                                      | 0.59                             |
| GPS:sCF <sub>3</sub> | 0.098                                                      | 0.030                                                      | 0.128                                                      | 0.64                             |
